# Supplementary material
Source: publisher figshare collection journal article supplement (https://acs.figshare.com/ndownloader/files/4444996)
Supplement: Supplementary file 1 [file 4444996]

**Supporting information**

# Homogeneous Dispersion of Magnetic Nanoparticles Aggregates in a PS Nanocomposite: Highly Reproducible Hierarchical Structure tuned by the Nanoparticles' Size.

*Anne-Sophie Robbes<sup>1,2</sup>, Jacques Jestin<sup>1</sup>, Florian Meneau<sup>2</sup>, Florent Dalmas<sup>3</sup>, Olivier*

*Sandre<sup>4</sup>, Javier Perez<sup>2</sup>, François Boué<sup>1</sup>, Fabrice Cousin<sup>1,\*</sup>*

<sup>1</sup>Laboratoire Léon Brillouin, CEA Saclay 91191 Gif sur Yvette, Cedex France

<sup>2</sup>Synchrotron SOLEIL L'Orme des Merisiers, PO Box 48, Saint-Aubin, 91192 Gif sur Yvette, France

<sup>3</sup>Institut de Chimie et des Matériaux Paris-Est, CNRS UMR 7182, 2-8 rue Henri Dunant 94320 Thiais, France

<sup>4</sup>Laboratoire Physicochimie des Electrolytes, Colloïdes et Sciences Analytiques, UMR CNRS-UPMC-Univ Paris 6-ESPCI-Paris Tech 7195, 4 place Jussieu, case 51, 75005 Paris, France

\* Corresponding author: [fabrice.cousin@cea.fr](mailto:fabrice.cousin@cea.fr)

# 1 SAXS spectra of suspensions of $\gamma\text{Fe}_2\text{O}_3$ magnetic nanoparticles in $\text{H}_2\text{O}$ and DMAc

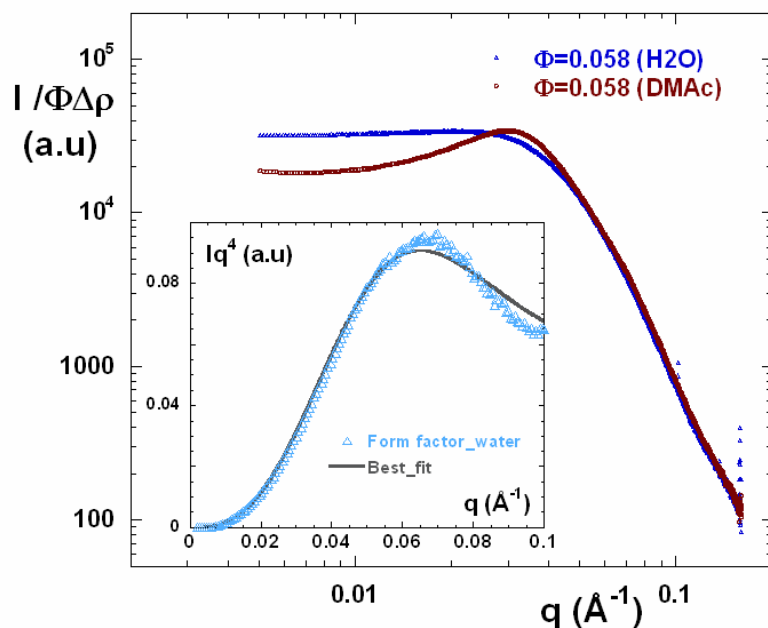

Figure SI 1.a: SAXS scattering curves for the suspensions of nanoparticles A either in water or in DMAc presented in a  $I(q)/\Phi\Delta\rho = f(q)$  representation.  $\Delta\rho$  stands either for  $(\rho_{\text{mag}} - \rho_{\text{DMAc}})^2$  or  $(\rho_{\text{mag}} - \rho_{\text{water}})^2$  depending on the solvent used. Inset:  $q^4 I(q)$  versus  $q$  for  $\Phi_{\text{mag}} = 0.001$  in water. The full line corresponds to the best fit of the form factor.

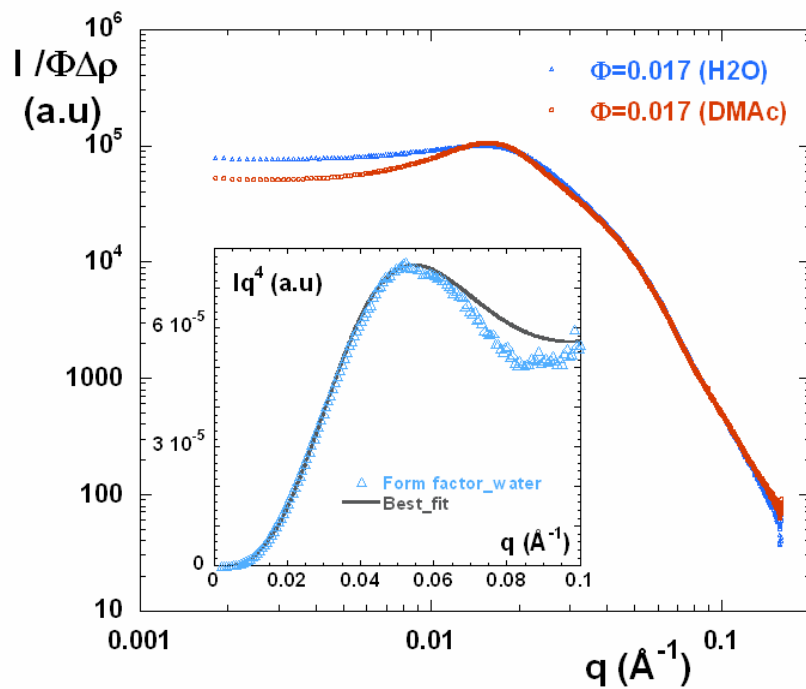

Figure SI 1.b: SAXS scattering curves for the suspensions of nanoparticles B either in water or in DMAc presented in a  $I(q)/\Phi\Delta\rho = f(q)$  representation.  $\Delta\rho$  stands either for  $(\rho_{\text{mag}} - \rho_{\text{DMAc}})^2$  or  $(\rho_{\text{mag}} - \rho_{\text{water}})^2$  depending on the solvent used. Inset:  $q^4I(q)$  versus  $q$  for  $\Phi_{\text{mag}} = 0.001$  in water. The full line corresponds to the best fit of the form factor.

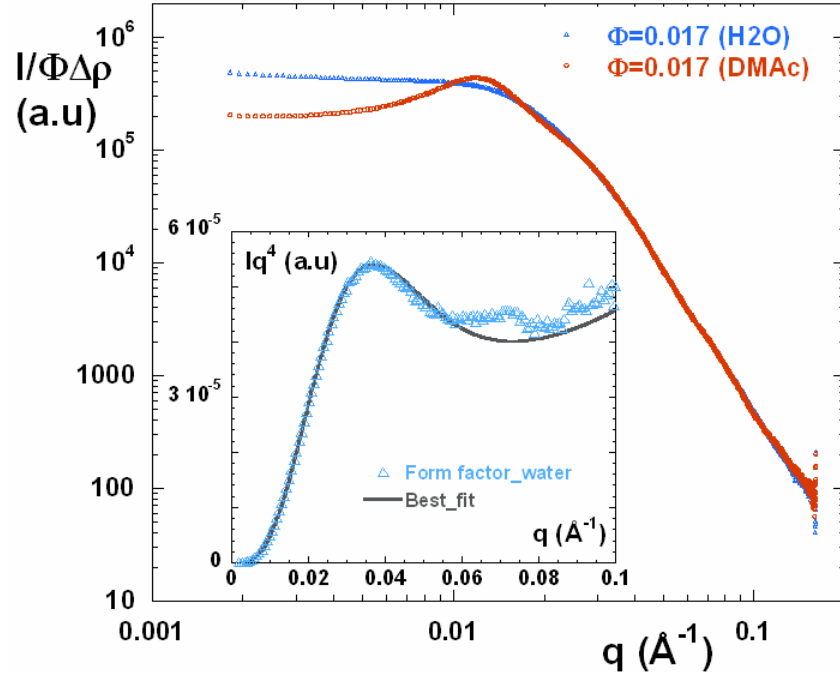

Figure SI 1.c: SAXS scattering curves for the suspensions of nanoparticles D either in water or in DMAc presented in a  $I(q)/\Phi\Delta\rho = f(q)$  representation.  $\Delta\rho$  stands either for  $(\rho_{\text{mag}} - \rho_{\text{DMAc}})^2$  or  $(\rho_{\text{mag}} - \rho_{\text{water}})^2$  depending on the solvent used. Inset:  $q^4I(q)$  versus  $q$  for  $\Phi_{\text{mag}} = 0.001$  in water. The full line corresponds to the best fit of the form factor.

## 2 Magnetization curves of suspensions of $\gamma\text{Fe}_2\text{O}_3$ magnetic nanoparticles in $\text{H}_2\text{O}$

In order to determine the volume fraction of the different suspensions after synthesis and the size distribution of the nanoparticles, we have measured the magnetization curves of the suspensions in  $\text{H}_2\text{O}$ .

We briefly recall the principle here. Each nanoparticle bears a magnetic moment  $\vec{\mu}$  which is of the order of  $10^4$  Bohr magnetons. Its modulus  $|\vec{\mu}| = m_s V_{\text{magn}}$  is proportional to the magnetic volume  $V_{\text{magn}}$  of the nanoparticles and to  $m_s$  the magnetization of the maghemite. Under a large applied field  $\vec{H}$ , this magnetic moment  $\vec{\mu}$  orientates along the field direction. In a liquid suspension of  $\gamma\text{-Fe}_2\text{O}_3$  nanoparticles of radius  $\sim 4$  nm, it also rotates mechanically the core of the nanoparticle. The alignment of  $\vec{\mu}$  along  $\vec{H}$  provides to the suspension a

macroscopic magnetization  $M$ . At saturation, all the magnetic moments align along  $\vec{H}$ , then  $M = M_S = m_s \Phi$ . For intermediate fields, the behavior of the suspension is superparamagnetic. For a suspension of monodisperse nanoparticles of radius  $R$ ,  $M$  is well described by the first Langevin law  $L(R)$  at low  $\Phi$  (when dipole-dipole correlations are neglected) :

$$M(H) = M_s \left( \coth \frac{\mu_0 \mu H}{kT} - \frac{kT}{\mu_0 \mu H} \right) \quad \text{with } M_S = m_s \Phi \quad (1)$$

For polydisperse suspensions, the shape of the curves  $M(H)$  is modified by the log-normal size distribution of the particles size  $P(R, \sigma)$  (see equation 2 of main text) :

$$\frac{M(H)}{M_s}(R_0, \sigma) = \frac{\int_0^\infty d^3 P(R) L(R, H) dR}{\int_0^\infty d^3 P(R) dR} \quad (2)$$

At low  $H$ , in the linear regime, the magnetization curve is proportional to the magnetic susceptibility of the nanoparticles. The magnetization curves are presented for the different batches of nanoparticles A, B, C and D in Figure SI.1.

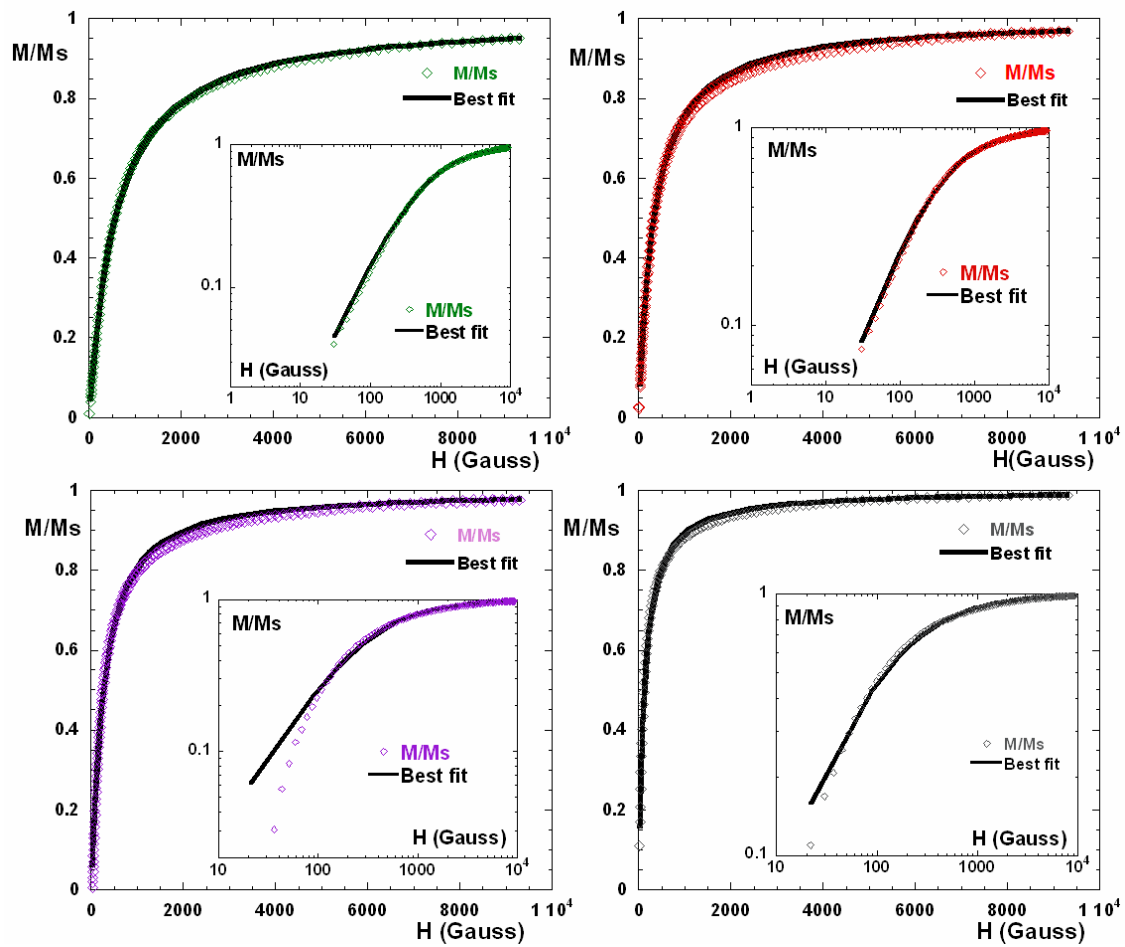

Figure SI.2: Magnetization curve of the suspensions of  $\gamma\text{Fe}_2\text{O}_3$  nanoparticles in  $\text{H}_2\text{O}$ . The magnetization curves are modelled by the first Langevin law and take into account the polydispersity of the nanoparticles. Inset: same curves in log-log scale. (a) batch A; (b) batch B; (c) batch C; (d) batch D.

### 3 SAXS spectra of $\gamma\text{Fe}_2\text{O}_3$ nanoparticles in the nanocomposite polymeric films

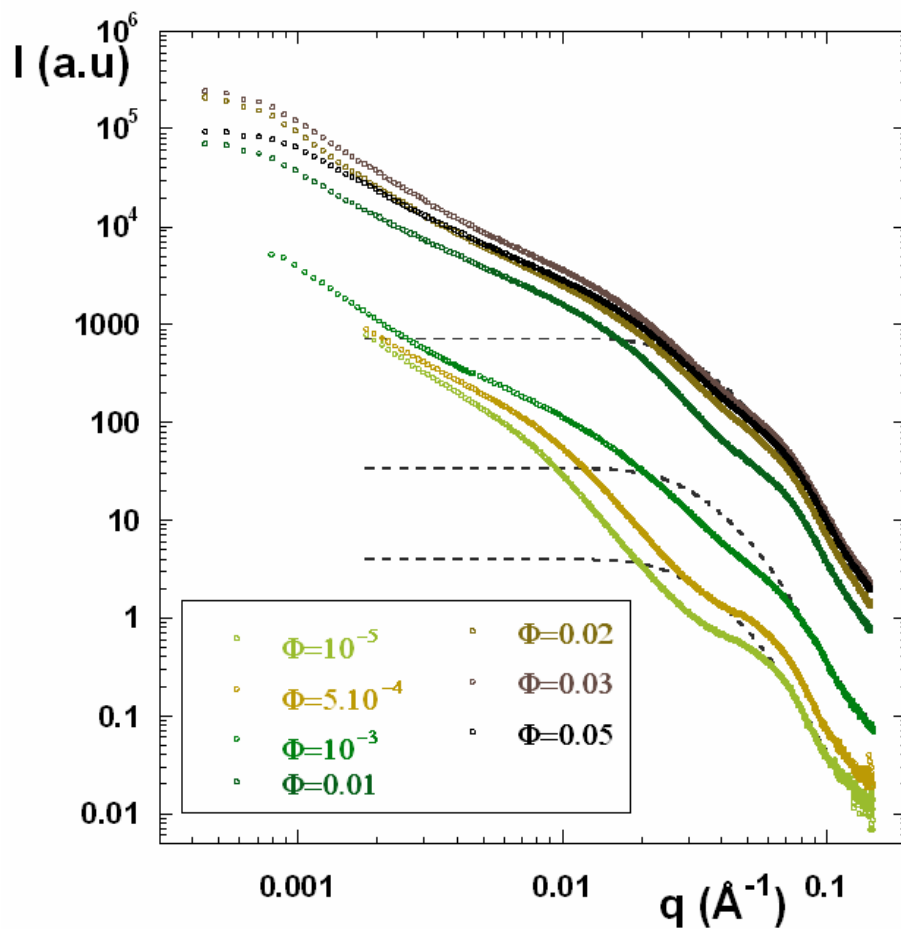

Figure SI.3.a: SAXS scattering curves of the  $\gamma\text{Fe}_2\text{O}_3$  nanoparticles in the PS polymeric matrix obtained by SAXS for nanoparticles A. The dashed lines correspond to the form factor of the nanoparticles.

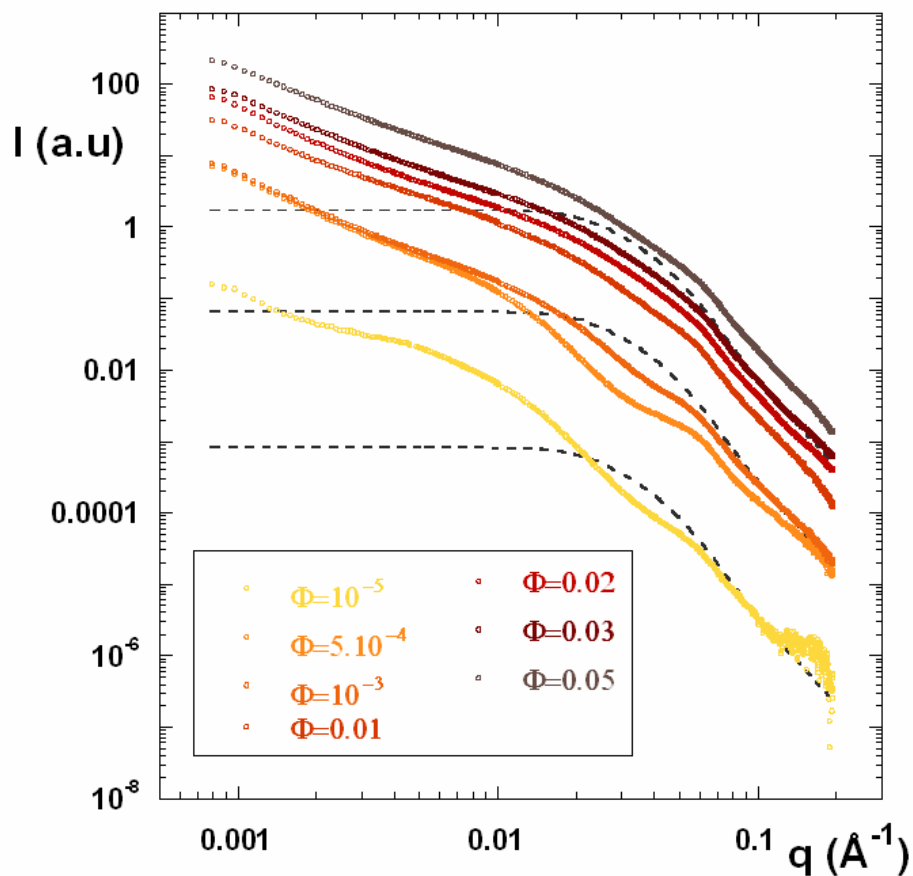

Figure SI.3.b: SAXS scattering curves of the  $\gamma\text{Fe}_2\text{O}_3$  nanoparticles in the PS polymeric matrix obtained by SAXS for nanoparticles B. The dashed lines correspond to the form factor of the nanoparticles.

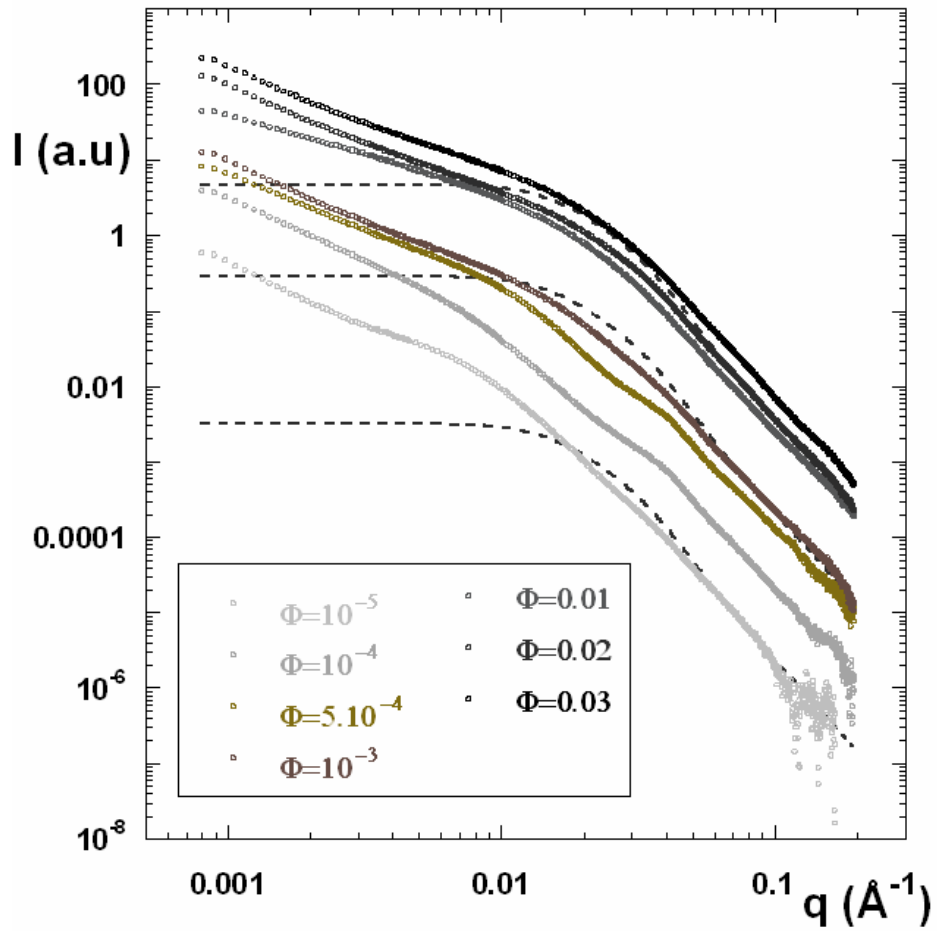

Figure SI.3.c: SAXS scattering curves of the  $\gamma\text{Fe}_2\text{O}_3$  nanoparticles in the PS polymeric matrix obtained by SAXS for nanoparticles D. The dashed lines correspond to the form factor of the nanoparticles.
